# Supplementary material
Source: PubMed Central journal article supplement (PMC6777233)
Supplement: jamaneurol-77-109-s001.pdf [file jamaneurol-77-109-s001.pdf]

## Supplementary Online Content

Koton S, Sang Y, Schneider ALC, Rosamond WD, Gottesman RF, Coresh J. Trends in stroke incidence rate in older US adults: an update from the Atherosclerosis Risk in Communities (ARIC) cohort study. *JAMA Neurol*. Published online September 30, 2019. doi:10.1001/jamaneurol.2019.3258

**eTable.** Crude total stroke incidence rates (per 1,000 person-years) stratified by 5-year age group and 3-year calendar period of follow-up

This supplementary material has been provided by the authors to give readers additional information about their work.

**eTable.** Crude total stroke incidence rates (per 1,000 person-years) stratified by 5-year age group and 3-year calendar period of follow-up

| Age group |             | Calendar period <sup>a</sup> |                             |                            |                 |                             |                            |                             |                            |                               |
|-----------|-------------|------------------------------|-----------------------------|----------------------------|-----------------|-----------------------------|----------------------------|-----------------------------|----------------------------|-------------------------------|
|           |             | 1990-1992                    | 1993-1995                   | 1996-1998                  | 1999-2001       | 2002-2004                   | 2005-2007                  | 2008-2010                   | 2011-2013                  | 2014-2017 <sup>b</sup>        |
| 45-49     | IR (95% CI) | 1.2 (0.5-2.6) <sup>c</sup>   |                             |                            |                 |                             |                            |                             |                            |                               |
|           | Cases/PY    | 6/5,130                      | 0/411                       |                            |                 |                             |                            |                             |                            |                               |
| 50-54     | IR (95% CI) | 1.7 (1.1-2.6)                | 1.2 (0.7-2.2)               | 0.7 (0.2-2.7) <sup>c</sup> |                 |                             |                            |                             |                            |                               |
|           | Cases/PY    | 19/11,386                    | 11/9,179                    | 2/2,919                    | 0/56            |                             |                            |                             |                            |                               |
| 55-59     | IR (95% CI) | 2.4 (1.7-3.6)                | 1.7 (1.1-2.7)               | 2.1 (1.4-3.2)              | 2.9 (1.9-4.5)   | 3.2 (1.2-8.6) <sup>c</sup>  |                            |                             |                            |                               |
|           | Cases/PY    | 26/10,664                    | 19/10,904                   | 23/10,831                  | 20/6,921        | 4/1,244                     |                            |                             |                            |                               |
| 60-64     | IR (95% CI) | 3.1 (2.2-4.4)                | 3.2 (2.3-4.6)               | 3.2 (2.2-4.5)              | 2.8 (1.9-4.0)   | 2.9 (2.0-4.2)               | 1.1 (0.5-2.7) <sup>c</sup> | 5.9 (1.5-23.6) <sup>c</sup> |                            |                               |
|           | Cases/PY    | 30/9,706                     | 32/9,890                    | 32/10,108                  | 29/10,386       | 28/9,625                    | 5/4,501                    | 2/339                       |                            |                               |
| 65-69     | IR (95% CI) | 3.1 (1.9-5.0)                | 5.5 (4.1-7.3)               | 5.5 (4.1-7.3)              | 3.3 (2.3-4.7)   | 5.1 (3.8-6.8)               | 2.9 (2.0-4.2)              | 2.6 (1.7-4.0)               | 0.4 (0.1-3.0) <sup>c</sup> | 23.7 (3.3-168.0) <sup>c</sup> |
|           | Cases/PY    | 16/5,194                     | 47/8,610                    | 49/8,937                   | 30/9,178        | 48/9,428                    | 28/9,619                   | 20/7,714                    | 1/2,382                    | 1/42                          |
| 70-74     | IR (95% CI) |                              | 5.2 (2.7-10.0) <sup>c</sup> | 6.9 (5.1-9.3)              | 6.4 (4.8-8.4)   | 5.5 (4.1-7.4)               | 4.2 (3.0-5.9)              | 3.9 (2.8-5.5)               | 4.9 (3.68-6.6)             | 3.7 (2.4-5.6)                 |
|           | Cases/PY    | 0/29                         | 9/1,739                     | 41/5,983                   | 50/7,830        | 44/7,943                    | 35/8,261                   | 33/8,523                    | 41/8,444                   | 22/5,948                      |
| 75-79     | IR (95% CI) |                              |                             |                            | 10.4 (7.1-15.1) | 6.3 (4.6-8.7)               | 6.7 (5.06-9.0)             | 6.7 (5.0-9.0)               | 6.6 (4.9-8.8)              | 5.47 (4.1-7.1)                |
|           | Cases/PY    |                              | 0/1                         | 0/179                      | 27/2,602        | 37/5,883                    | 44/6,601                   | 46/6,857                    | 46/6,987                   | 51/9,505                      |
| 80-84     | IR (95% CI) |                              |                             |                            |                 | 8.1 (3.0-21.5) <sup>c</sup> | 8.3 (5.6-12.3)             | 10.1 (7.6-13.3)             | 8.2 (6.0-11.1)             | 6.5 (4.9-8.7)                 |
|           | Cases/PY    |                              |                             |                            |                 | 4/495                       | 25/3,012                   | 48/4,793                    | 41/5,033                   | 46/7,067                      |
| 85-92     | IR (95% CI) |                              |                             |                            |                 |                             |                            | 7.7 (3.5-17.2) <sup>c</sup> | 6.8 (4.2-10.9)             | 12.6 (9.9-16.0)               |
|           | Cases/PY    |                              |                             |                            |                 |                             | 0/11                       | 6/777                       | 17/2,507                   | 67/5,307                      |

Abbreviation: IR- incidence rate

- a. Total number of participants: 14,357; total number of incident stroke: 1,340 (29 cases before 1990 are not shown in this table); total length of follow-up: over 326,654 person-years of follow-up.
- b. Last period includes 4 years (2014-2017).
- c. Data based on fewer than 10 cases.
